# Supplementary material
Source: publisher figshare collection journal article supplement (https://adisjournals.figshare.com/articles/dataset/_/21106339)

# NO INCREASED RISK OF OVERALL INFECTION IN ADULTS WITH MODERATE-TO-SEVERE ATOPIC DERMATITIS TREATED FOR UP TO 4 YEARS WITH DUPILUMAB

Andrew Blauvelt · Andreas Wollenberg · Lawrence F. Eichenfield ·  
Haixin Zhang · Debra Sierka · Faisal A. Khokhar · Jignesh Vakil ·  
Arsalan Shabbir · Ainara Rodriguez Marco · Sonya L. Cyr

Advances in Therapy

Patients with moderate-to-severe atopic dermatitis are at risk  
for **bacterial and viral skin infections**, which can, in turn,  
predispose them to serious and systemic infections.

## LIBERTY AD OLE 4-YEAR DATA

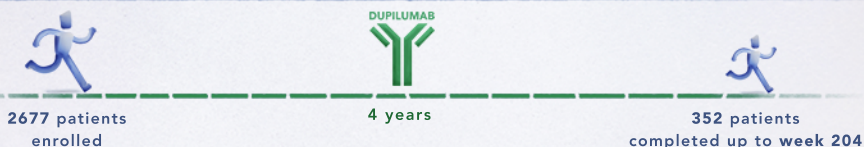

300 mg dupilumab:  
every week (qw) / every 2 weeks (q2w)\*

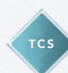

Topical  
corticosteroids  
were allowed

\*Included 226 patients switched to q2w dosing following protocol amendment in November 2019  
to align with the dose regimen approved by regulatory agencies

## INFECTION RATES

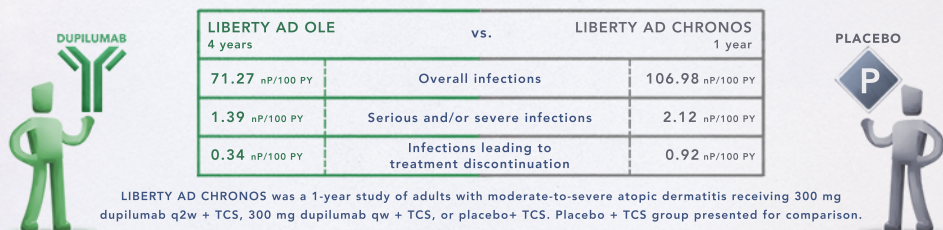

The most common infection in all groups was **nasopharyngitis**.

## TOTAL SKIN INFECTIONS

Patients with  $\geq 1$  event per 100 patient-years (nP/100 PY)

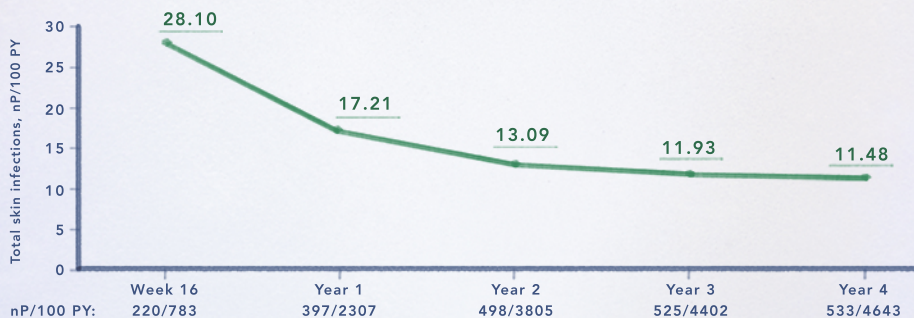

The cumulative number of patients with total skin infections decreased over the 4 years of dupilumab treatment.

## CONCLUSIONS

4 years of continuous, long-term **dupilumab** treatment in adults with moderate-to-severe atopic dermatitis does not increase the overall risk of systemic or cutaneous infections.

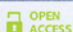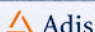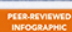

Supplement: Supplementary file 1 [file 1]
